# Supplementary material
Source: Springer Nature journal article supplement (https://www.springermedizin.de/resource/supplementary/12936_2009_1016_MOESM2_ESM.pdf/9548784)
Supplement: MOESM2 [file 9548784]

*An. gambiae s.s*

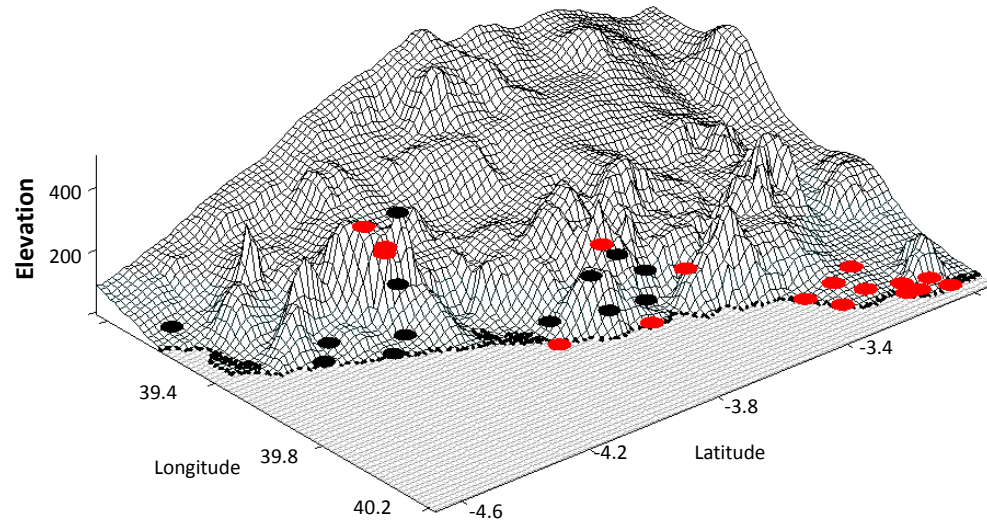

*An. arabiensis*

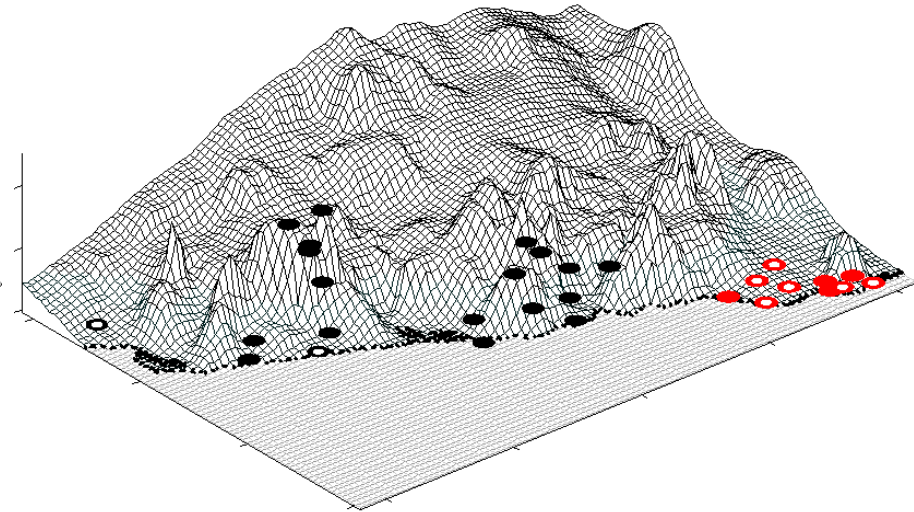

*An. funestus*

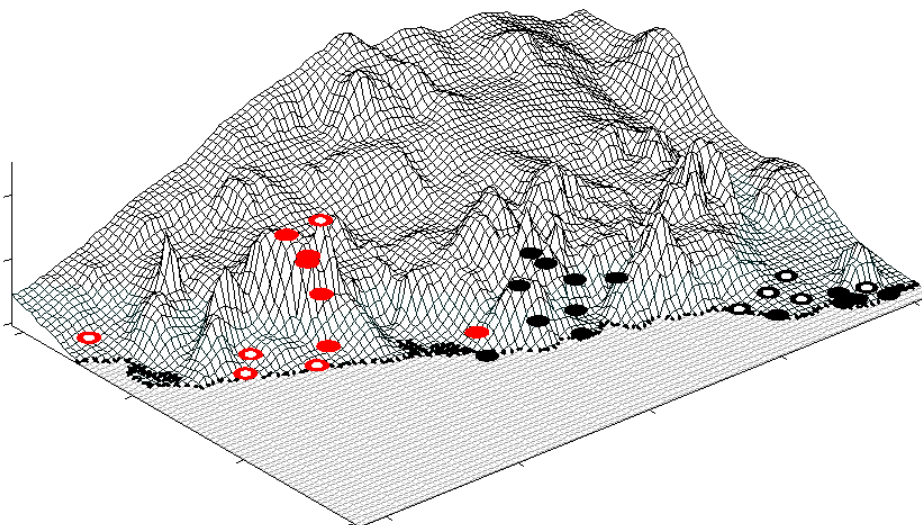

**Cluster Z score for EIRs**

High

- > 1.96 Significantly high
- 0 to 1.96

Low

- < -1.96 Significantly low
- 0 to -1.96
